# Supplementary material for: Synthesis and upconversion emission studies of CaYF5:Ho3+/Yb3+ phosphor and its applications in optical thermometry, fingerprint detection, and security ink
Source: Royal Society of Chemistry journal article supplement (doi:10.1039/d3ra00644a), 2023-01-01
Supplement: d3ra00644a1.pdf [file d3ra00644a1.pdf]

# **Synthesis and Upconversion Emission Studies of $\text{CaYF}_5:\text{Ho}^{3+}/\text{Yb}^{3+}$ Phosphor and its Applications as Optical Thermometry and Fingerprint Detection, and Security Ink**

Kumar Shweta<sup>b</sup>, Madan M. Upadhyay<sup>a</sup>, K. Kumar<sup>a\*</sup>

<sup>a</sup> Optical Materials and Bio-imaging Research Laboratory, Department of Physics, Indian Institute of Technology (Indian School of Mines), Dhanbad-826004 India

\*Corresponding author E-mail: [kkumar@iitism.ac.in](mailto:kkumar@iitism.ac.in)

## **Supplementary information**

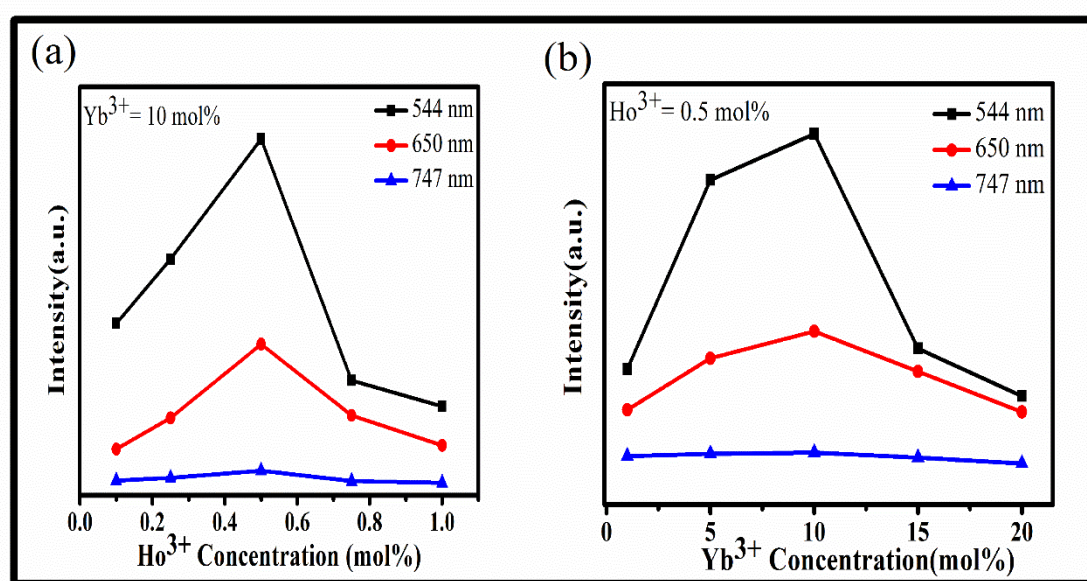

**Figure S1: Variation in upconversion emission intensity with (a) variation in  $\text{Ho}^{3+}$  concentration with fixed  $\text{Yb}^{3+}$  concentration and (b) variation in  $\text{Yb}^{3+}$  concentration with fixed  $\text{Ho}^{3+}$  concentration.**
